# Supplementary material for: Colletotrichum Species Associated with Peaches in China
Source: MDPI journal article supplement (doi:10.3390/jof8030313), 2022-03-18
Supplement: s1 [file s1]

**Table S1.** Primers used in this study, with sequences, annealing temperature and sources.

| Gene/Locus   | Primer name | Direction | Primer sequence (5'to 3')  | Ta(°C) | Reference                   |
|--------------|-------------|-----------|----------------------------|--------|-----------------------------|
| ITS          | ITS1-F      | Forward   | CTTGGTCATTTAGAGGAAGTAA     | 52     | Gardes and Bruns [78]       |
|              | ITS-4       | Reverse   | TCCTCCGCTTATTGATATGC       |        | White et al. [79]           |
| <i>GAPDH</i> | GDF1        | Forward   | GCCGTCAACGACCCCTTCATTGA    | 60     | Guerber et al. [80]         |
|              | GDR1        | Reverse   | GGGTGGAGTCGTACTTGAGCATGT   |        |                             |
| <i>CHS-1</i> | CHS-79F     | Forward   | TGGGGCAAGGATGCTTGGAAGAAG   | 58     | Carbone and Kohn [81]       |
|              | CHS-354R    | Reverse   | TGGAAGAACCATCTGTGAGAGTTG   |        |                             |
| <i>ACT</i>   | ACT-512F    | Forward   | ATGTGCAAGGCCGTTTCGC        | 58     | Carbone and Kohn [81]       |
|              | ACT-783R    | Reverse   | TACGAGTCCTTCTGGCCCAT       |        |                             |
| <i>TUB2</i>  | Btub2Fd     | Forward   | GTBCACCTYCARACCGGYCARTG    | 52     | Woudenberg et al. [82]      |
|              | Btub4Rd     | Reverse   | CCRGAYTGRCCRAARACRAAGTTGTC |        |                             |
|              | T1          | Forward   | AACATGCGTGAGATTGTAAGT      | 52     | O'Donnell and Cigelnik [83] |
|              | Bt2b        | Reverse   | ACCCTCAGTGTAGTGACCCCTTGGC  |        | Glass and Donaldson [84]    |
| <i>HIS3</i>  | CYLH3F      | Forward   | AGGTCCACTGGTGGCAAG         | 52     | Crous et al. [85]           |
|              | CYLH3R      | Reverse   | AGCTGGATGTCCTTGGA CTG      |        |                             |
| <i>CAL</i>   | CL1C        | Forward   | GAATTCAAGGAGGCCTTCTC       | 59     | Weir et al. [51]            |
|              | CL2C        | Reverse   | CTTCTGCATCATGAGCTGGAC      |        |                             |

**Table S2.** Isolates of seven *Colletotrichum* species collected from peaches in China, with details about host tissue, location, and GenBank accession number.

| Species             | Isolate <sup>a</sup>              | Host tissue | Location            | GenBank accession number |          |          |          |          |          |          |
|---------------------|-----------------------------------|-------------|---------------------|--------------------------|----------|----------|----------|----------|----------|----------|
|                     |                                   |             |                     | ITS                      | GAPDH    | CHS-1    | ACT      | TUB2     | HIS3     | CAL      |
| <i>C. fioriniae</i> | ZJLS 1                            | Fruit       | Lishui, Zhejiang    | MN807705                 | MN829566 | MN829685 | MN829616 | MN829766 | MN829735 | -        |
|                     | ZJLS 6-2                          | Fruit       | Lishui, Zhejiang    | MN807706                 | MN829567 | MN829686 | MN829617 | MN829767 | MN829736 | -        |
|                     | ZJLS 11-1                         | Fruit       | Lishui, Zhejiang    | MN807707                 | MN829568 | MN829687 | MN829618 | MN829768 | MN829737 | -        |
|                     | GZTR 4-1                          | Fruit       | Tongren, Guizhou    | MN807708                 | MN829569 | MN829688 | MN829619 | MN829769 | MN829738 | -        |
|                     | GZTR 7-1                          | Fruit       | Tongren, Guizhou    | MN807709                 | MN829570 | MN829689 | MN829620 | MN829770 | MN829739 | -        |
|                     | JXJA 1                            | Fruit       | Jian, Jiangxi       | MN807710                 | MN829571 | MN829690 | MN829621 | MN829771 | MN829740 | -        |
|                     | JXJA 3                            | Fruit       | Jian, Jiangxi       | MN807711                 | MN829572 | MN829691 | MN829622 | MN829772 | MN829741 | -        |
|                     | JXJA 6                            | Fruit       | Jian, Jiangxi       | MN807712                 | MN829573 | MN829692 | MN829623 | MN829773 | MN829742 | -        |
| <i>C. folicola</i>  | YNHH 2-2                          | Leaf        | Honghe, Yunnan      | MN807724                 | MN829585 | MN829704 | MN829635 | MN829785 | MN829754 | -        |
|                     | YNHH 10-1,<br>CCTCC M<br>2020345* | Leaf        | Honghe, Yunnan      | MN807725                 | MN829586 | MN829705 | MN829636 | MN829786 | MN829755 | -        |
| <i>C. fruticola</i> | GZTR 10-1                         | Fruit       | Tongren, Guizhou    | MN807726                 | MN829587 | MN829706 | MN829637 | MN829787 | -        | MN829656 |
|                     | GZTR 11-1                         | Fruit       | Tongren, Guizhou    | MN807727                 | MN829588 | MN829707 | MN829638 | MN829788 | -        | MN829657 |
|                     | GZTR 13-1                         | Fruit       | Tongren, Guizhou    | MN807728                 | MN829589 | MN829708 | MN829639 | MN829789 | -        | MN829658 |
|                     | GDHY 1                            | Fruit       | Heyuan, Guangdong   | MN807729                 | MN829590 | MN829709 | MN829640 | MN829790 | -        | MN829659 |
|                     | GDHY 5-2                          | Fruit       | Heyuan, Guangdong   | MN807730                 | MN829591 | MN829710 | MN829641 | MN829791 | -        | MN829660 |
|                     | GDHY 6-1                          | Fruit       | Heyuan, Guangdong   | MN807731                 | MN829592 | MN829711 | MN829642 | MN829792 | -        | MN829661 |
|                     | GDHY 10-1                         | Fruit       | Heyuan, Guangdong   | MN807732                 | MN829593 | MN829712 | MN829643 | MN829793 | -        | MN829662 |
|                     | GDSG 1-1                          | Fruit       | Shaoguan, Guangdong | MN807733                 | MN829594 | MN829713 | MN829644 | MN829794 | -        | MN829663 |
|                     | GDSG 3-1                          | Fruit       | Shaoguan, Guangdong | MN807734                 | MN829595 | MN829714 | MN829645 | MN829795 | -        | MN829664 |
|                     | GDSG 5-1                          | Fruit       | Shaoguan, Guangdong | MN807735                 | MN829596 | MN829715 | MN829646 | MN829796 | -        | MN829665 |
| <i>C. godetiae</i>  | YNHH 1-1                          | Leaf        | Honghe, Yunnan      | MN807713                 | MN829574 | MN829693 | MN829624 | MN829774 | MN829743 | -        |
|                     | YNHH 2-1                          | Leaf        | Honghe, Yunnan      | MN807714                 | MN829575 | MN829694 | MN829625 | MN829775 | MN829744 | -        |

|                     |           |       |                    |          |          |          |          |          |          |          |
|---------------------|-----------|-------|--------------------|----------|----------|----------|----------|----------|----------|----------|
| <i>C. karsti</i>    | YNHH 4-1  | Leaf  | Honghe,Yunnan      | MN807715 | MN829576 | MN829695 | MN829626 | MN829776 | MN829745 | -        |
|                     | YNHH 6-1  | Leaf  | Honghe,Yunnan      | MN807716 | MN829577 | MN829696 | MN829627 | MN829777 | MN829746 | -        |
|                     | YNHH 7-2  | Leaf  | Honghe,Yunnan      | MN807717 | MN829578 | MN829697 | MN829628 | MN829778 | MN829747 | -        |
|                     | YNHH 8-1  | Leaf  | Honghe,Yunnan      | MN807718 | MN829579 | MN829698 | MN829629 | MN829779 | MN829748 | -        |
|                     | YNHH 9-1  | Leaf  | Honghe,Yunnan      | MN807719 | MN829580 | MN829699 | MN829630 | MN829780 | MN829749 | -        |
|                     | YNHH 11-1 | Leaf  | Honghe,Yunnan      | MN807720 | MN829581 | MN829700 | MN829631 | MN829781 | MN829750 | -        |
|                     | YNHH 3-1  | Leaf  | Honghe,Yunnan      | MN807721 | MN829582 | MN829701 | MN829632 | MN829782 | MN829751 | MT732370 |
|                     | YNHH 3-2  | Leaf  | Honghe,Yunnan      | MN807722 | MN829583 | MN829702 | MN829633 | MN829783 | MN829752 | MT732371 |
|                     | YNHH 5-2  | Leaf  | Honghe,Yunnan      | MN807723 | MN829584 | MN829703 | MN829634 | MN829784 | MN829753 | MT732372 |
|                     | HBVC 1    | Fruit | Yichang,Hubei      | MN807695 | MN829556 | MN829675 | MN829606 | MN829756 | MN829725 |          |
| <i>C. nymphaeae</i> | HBJM 1-1  | Fruit | Jingmen,Hubei      | MN807696 | MN829557 | MN829676 | MN829607 | MN829757 | MN829726 | -        |
|                     | HBWH 2-1  | Fruit | Wuhan,Hubei        | MN807697 | MN829558 | MN829677 | MN829608 | MN829758 | MN829727 | -        |
|                     | HBWH 3-2  | Leaf  | Wuhan,Hubei        | MW157938 | MW161235 | MW161236 | MW161237 | MW161238 | MW161239 |          |
|                     | HBXG 1    | Fruit | Xiaogan,Hubei      | MN807698 | MN829559 | MN829678 | MN829609 | MN829759 | MN829728 | -        |
|                     | SCCD 1    | Fruit | Chengdu,Sichuan    | MN807699 | MN829560 | MN829679 | MN829610 | MN829760 | MN829729 | -        |
|                     | GZQZ 4    | Fruit | Qingzhen,Guizhou   | MN807700 | MN829561 | MN829680 | MN829611 | MN829761 | MN829730 | -        |
|                     | GXGL 3-1  | Fruit | Guilin,Guangxi     | MN807701 | MN829562 | MN829681 | MN829612 | MN829762 | MN829731 | -        |
|                     | GXGL 12-1 | Leaf  | Guilin,Guangxi     | MN807702 | MN829563 | MN829682 | MN829613 | MN829763 | MN829732 | -        |
|                     | FJFZ 1    | Fruit | Fuzhou,Fujian      | MN807703 | MN829564 | MN829683 | MN829614 | MN829764 | MN829733 | -        |
|                     | GZTR 8-1  | Fruit | Tongren,Guizhou    | MN807704 | MN829565 | MN829684 | MN829615 | MN829765 | MN829734 | -        |
| <i>C. siamense</i>  | SDQD 1-1  | Fruit | Qingdao,Shandong   | MN807736 | MN829597 | MN829716 | MN829647 | MN829797 | -        | MN829666 |
|                     | SDQD 5    | Fruit | Qingdao,Shandong   | MN807737 | MN829598 | MN829717 | MN829648 | MN829798 | -        | MN829667 |
|                     | SDQD 7-1  | Fruit | Qingdao,Shandong   | MN807738 | MN829599 | MN829718 | MN829649 | MN829799 | -        | MN829668 |
|                     | SDQD 10-1 | Fruit | Qingdao,Shandong   | MN807739 | MN829600 | MN829719 | MN829650 | MN829800 | -        | MN829669 |
|                     | SDQD 15-2 | Fruit | Qingdao,Shandong   | MN807740 | MN829601 | MN829720 | MN829651 | MN829801 | -        | MN829670 |
|                     | HBSJZ 1-1 | Fruit | Shijiazhuang,Hebei | MN807741 | MN829602 | MN829721 | MN829652 | MN829802 | -        | MN829671 |

|           |       |                    |          |          |          |          |          |   |          |
|-----------|-------|--------------------|----------|----------|----------|----------|----------|---|----------|
| HBSJZ 3-1 | Fruit | Shijiazhuang,Hebei | MN807742 | MN829603 | MN829722 | MN829653 | MN829803 | - | MN829672 |
| HBSJZ 5-1 | Fruit | Shijiazhuang,Hebei | MN807743 | MN829604 | MN829723 | MN829654 | MN829804 | - | MN829673 |
| HBSJZ 7-1 | Fruit | Shijiazhuang,Hebei | MN807744 | MN829605 | MN829724 | MN829655 | MN829805 | - | MN829674 |

<sup>a</sup> CCTCC: China Center for Type Culture Collection. \* = Ex-type culture.

**Table S3.** The sizes of conidia, appresoria, ascospores and mycelial growth rate of the representative isolates of *Colletotrichum* spp. obtained in this study.

| Species and Isolate | Conidia <sup>a</sup> |            |                            | Appresoria <sup>b</sup> |            |                               | Ascospores <sup>c</sup> |            |                               | Mycelial growth rate (mm/d) <sup>d</sup> |           |
|---------------------|----------------------|------------|----------------------------|-------------------------|------------|-------------------------------|-------------------------|------------|-------------------------------|------------------------------------------|-----------|
|                     | Length (μm)          | Width (μm) | Means ± SD of conidia (μm) | Length (μm)             | Width (μm) | Means ± SD of appresoria (μm) | Length (μm)             | Width (μm) | Means ± SD of ascospores (μm) | 25°C                                     | 30°C      |
| <i>C. nymphaeae</i> | 8.8-16.6             | 3.1-6.3    | 12.1±0.9a×4.6±0.5a         | 4.1-12.8                | 2.2-6.7    | 7.2±0.5a×4.9±0.4a             | /                       | /          | /                             | 6.3±0.2a                                 | 3.7±0.3bc |
| FJFZ 1              | 9.2-13.0             | 3.6-5.2    | 11.5±1.0×4.3±0.4           | 5.5-9.3                 | 3.5-5.6    | 6.9±0.8×4.9±0.5               | /                       | /          | /                             | 6.5±0.2                                  | 3.7±0.2   |
| GXGL 13-1           | 11.5-16.6            | 3.9-6.2    | 14.0±1.3×5.0±0.5           | 5.6-10.3                | 4.2-5.8    | 7.3±1.0×5.1±0.4               | /                       | /          | /                             | 6.7±0.6                                  | 4.3±0.2   |
| GZTR 8-1            | 9.1-12.9             | 3.7-5.1    | 11.4±1.0×4.4±0.4           | 4.1-12.8                | 2.2-6.0    | 8.3±2.0×4.5±0.9               | /                       | /          | /                             | 6.1±0.4                                  | 3.2±0.3   |
| HBJM 1-1            | 8.8-13.0             | 3.5-5.1    | 11.4±1.1×4.5±0.3           | 5.1-12.3                | 2.7-5.7    | 7.5±1.6×4.2±0.7               | /                       | /          | /                             | 6.3±0.4                                  | 3.5±0.2   |
| HBWH 2-1            | 11.1-14.4            | 3.9-5.2    | 12.5±0.9×4.5±0.3           | 4.9-9.4                 | 4.3-6.5    | 6.8±1.0×5.2±0.5               | /                       | /          | /                             | 6.4±0.5                                  | 3.5±0.3   |

|                      |           |         |                      |          |         |                     |           |         |                    |           |           |
|----------------------|-----------|---------|----------------------|----------|---------|---------------------|-----------|---------|--------------------|-----------|-----------|
| HBWH 3-2             | 9.9-13.3  | 4.4-6.3 | 11.9±0.8×5.1±0.4     | 5.0-8.6  | 4.1-6.2 | 6.5±0.8×5.2±0.5     | /         | /       | /                  | 6.0±0.2   | 3.5±0.2   |
| HBXG 1               | 9.2-13.8  | 3.6-4.8 | 11.9±1.1×4.3±0.3     | 5.3-10.9 | 3.4-5.6 | 7.5±1.6×4.6±0.5     | /         | /       | /                  | 6.4±0.2   | 4.1±0.3   |
| HBYC 1               | 10.4-14.8 | 4.7-6.1 | 12.9±0.9×5.4±0.4     | 6.1-9.4  | 4.2-6.7 | 7.3±0.9×5.5±0.6     | /         | /       | /                  | 6.4±0.6   | 3.6±0.3   |
| SCCD 1               | 8.9-13.2  | 3.1-5.0 | 11.4±1.1×4.1±0.4     | 5.7-8.7  | 4.3-6.5 | 7.1±0.9×5.4±0.4     | /         | /       | /                  | 6.3±0.5   | 3.8±0.4   |
| <i>C. fioriniae</i>  | 11.5-17.2 | 3.6-6.4 | 14.2±0.6bc×5.0±0.5ab | 5.0-11.6 | 3.7-6.9 | 7.1±0.5a×5.2±0.2ab  | /         | /       | /                  | 7.5±0.5a  | 4.7±0.3c  |
| GZTR 7-1             | 12.3-16.9 | 4.2-5.2 | 14.1±1.1×4.6±0.3     | 6.4-11.6 | 4.3-6.9 | 7.5±1.0×5.4±0.5     | /         | /       | /                  | 8.0±0.4   | 5.1±0.2   |
| JXJA 1               | 11.5-15.9 | 3.6-5.3 | 13.8±1.0×4.7±0.3     | 6.2-10.2 | 3.7-6.6 | 7.5±1.1×5.0±0.7     | /         | /       | /                  | 7.9±0.2   | 4.5±0.1   |
| JXJA 6               | 12.3-17.2 | 5.3-6.4 | 15.2±1.2×5.8±0.3     | 5.9-8.3  | 4.1-6.4 | 7.1±0.6×5.3±0.5     | /         | /       | /                  | 7.4±0.4   | 4.8±0.5   |
| ZJLS 1               | 11.6-17.1 | 3.7-5.1 | 14.1±1.3×4.7±0.3     | 5.0-7.4  | 3.7-6.1 | 6.2±0.7×5.0±0.6     | /         | /       | /                  | 7.0±0.4   | 4.8±0.4   |
| ZJLS 11-1            | 12.0-15.7 | 4.5-6.2 | 13.7±0.8×5.2±0.5     | 5.6-9.9  | 4.3-6.4 | 7.3±0.9×5.3±0.5     | /         | /       | /                  | 7.0±0.3   | 4.3±0.4   |
| <i>C. godetiae</i>   | 10.7-17.5 | 4.2-6.8 | 14.4±0.5cd×5.4±0.4b  | 6.2-14.9 | 3.3-9.5 | 9.3±1.0c×5.4±0.8ab  | /         | /       | /                  | 6.7±1.4a  | 1.0±0.1a  |
| YNHH 1-1             | 12.6-16.5 | 4.2-5.3 | 14.0±0.8×4.8±0.3     | 6.2-13.4 | 4.1-6.4 | 8.5±1.6×5.0±0.5     | /         | /       | /                  | 7.4±0.1   | 1.0±0.5   |
| YNHH 4-1             | 12.0-15.5 | 4.7-6.5 | 14.1±0.9×5.4±0.4     | 7.7-14.2 | 4.1-6.6 | 10.3±1.5×5.4±0.6    | /         | /       | /                  | 7.4±0.2   | 1.0±0.4   |
| YNHH 6-1             | 12.7-17.5 | 4.7-6.8 | 15.3±1.3×5.7±0.6     | 6.3-12.7 | 3.3-6.6 | 9.5±1.8×5.0±0.8     | /         | /       | /                  | 7.7±0.3   | 1.1±0.5   |
| YNHH 8-2             | 10.7-15.7 | 4.5-6.0 | 14.2±1.2×5.2±0.3     | 6.9-14.9 | 5.0-9.5 | 10.6±2.0×6.9±1.1    | /         | /       | /                  | 6.4±0.3   | 0.9±0.5   |
| YNHH 9-1             | 12.1-15.4 | 4.6-6.0 | 13.9±0.8×5.2±0.4     | 6.5-9.3  | 4.6-7.0 | 8.1±0.6×5.5±0.5     | /         | /       | /                  | 7.6±0.1   | 1.1±0.5   |
| <i>C. fructicola</i> | 9.3-18.9  | 3.4-8.2 | 14.3±1.7cd×5.6±0.5b  | 6.2-10.6 | 4.5-7.3 | 8.0±0.6ab×5.9±0.5bc | 12.6-22.0 | 3.1-7.6 | 17.3±0.5a×5.0±0.5a | 11.1±1.1c | 10.8±1.2e |
| GDHY 10-1            | 13.8-18.9 | 4.7-8.2 | 16.4±1.2×6.2±0.8     | 6.8-10.3 | 5.0-6.9 | 8.6±0.7×5.9±0.6     | 12.8-22.0 | 3.1-6.5 | 17.3±2.4×5.1±0.8   | 9.5±0.3   | 9.2±0.3   |
| GDSG 1-1             | 13.8-17.2 | 4.8-5.9 | 14.9±0.8×5.5±0.3     | 7.2-10.6 | 5.6-7.3 | 8.2±0.8×6.4±0.4     | 13.5-20.4 | 3.4-6.7 | 16.8±2.0×5.0±0.8   | 11.3±0.3  | 11.2±0.3  |
| GDSG 5-1             | 12.1-15.8 | 4.2-6.5 | 13.8±1.0×5.5±0.5     | 6.8-8.5  | 5.2-7.0 | 7.6±0.4×6.0±0.4     | 14.9-19.9 | 3.6-7.6 | 17.9±1.3×5.5±0.7   | 11.3±0.1  | 10.8±0.4  |
| GZTR 10-1            | 9.3-15.8  | 3.4-6.1 | 12.3±1.5×5.1±0.6     | 6.2-8.5  | 4.5-6.4 | 7.3±0.6×5.3±0.5     | 12.6-21.7 | 3.4-5.8 | 17.0±2.2×4.4±0.6   | 12.1±0.4  | 11.9±0.2  |

|                     |           |         |                     |          |         |                     |           |         |                    |           |           |
|---------------------|-----------|---------|---------------------|----------|---------|---------------------|-----------|---------|--------------------|-----------|-----------|
| <i>C. siamense</i>  | 13.2-18.3 | 4.6-6.3 | 15.3±0.4d×5.4±0.3b  | 6.3-9.8  | 4.5-7.3 | 8.0±0.2ab×5.8±0.4bc | /         | /       | /                  | 11.2±0.4c | 11.1±1.8e |
| SDQD 1-1            | 14.0-17.5 | 4.6-6.0 | 15.6±1.0×5.2±0.3    | 7.2-9.5  | 4.7-6.9 | 8.0±0.6×5.7±0.5     | /         | /       | /                  | 10.8±0.2  | 8.5±0.6   |
| SDQD 10-1           | 13.2-18.3 | 5.0-6.1 | 15.7±1.1×5.6±0.3    | 6.7-8.9  | 5.4-7.2 | 8.0±0.5×6.4±0.5     | /         | /       | /                  | 11.8±0.3  | 12.3±0.6  |
| HBSJZ 1-1           | 13.2-16.6 | 4.8-6.3 | 14.8±1.0×5.6±0.4    | 6.4-9.8  | 4.5-7.3 | 7.7±0.9×5.6±0.6     | /         | /       | /                  | 11.2±0.8  | 12.0±0.5  |
| HBSJZ 3-1           | 13.2-18.3 | 4.6-5.8 | 15.2±1.3×5.1±0.4    | 6.3-9.5  | 4.7-7.0 | 8.1±0.9×5.4±0.5     | /         | /       | /                  | 11.1±1.0  | 11.8±0.8  |
| <i>C. karsti</i>    | 10.6-14.9 | 5.8-7.4 | 12.9±0.3ab×6.7±0.2c | 6.8-14.4 | 5.1-7.8 | 9.3±0.8c×6.3±0.1c   | 11.5-17.8 | 4.0-7.1 | 14.6±0.6b×5.2±0.2a | 8.9±0.1b  | 8.5±0.1d  |
| YNHH 3-1            | 10.6-14.3 | 6.2-7.4 | 12.84±0.93×6.8±0.3  | 6.8-14.4 | 5.1-7.2 | 9.4±1.7×6.3±0.5     | 11.6-16.5 | 4.1-6.8 | 13.9±1.3×4.9±0.6   | 8.7±0.6   | 8.5±0.1   |
| YNHH 3-2            | 11.4-14.9 | 6.3-7.4 | 13.3±0.8×6.7±0.3    | 7.2-13.0 | 5.1-7.6 | 10.0±1.4×6.4±0.6    | 11.5-17.8 | 4.0-7.1 | 14.9±1.5×5.3±0.8   | 8.8±0.5   | 8.7±0.3   |
| YNHH 5-2            | 11.6-14.1 | 5.8-7.1 | 12.7±0.6×6.4±0.4    | 6.9-11.6 | 5.1-7.8 | 8.5±1.1×6.2±0.6     | 11.5-17.8 | 4.0-7.1 | 14.9±1.5×5.3±0.8   | 9.0±0.6   | 8.4±0.2   |
| <i>C. follicola</i> | 12.3-15.4 | 5.6-7.8 | 13.6±0.1bc×6.5±0.3c | 5.6-13.7 | 4.0-8.2 | 8.4±0.5bc×5.9±0.1bc | /         | /       | /                  | 6.3±0.4a  | 2.8±0.2b  |
| YNHH 2-2            | 12.7-15.4 | 5.6-6.8 | 13.7±0.6×6.3±0.3    | 6.7-10.1 | 4.0-7.2 | 8.0±0.9×5.9±0.8     | /         | /       | /                  | 6.1±0.7   | 3.0±0.5   |
| YNHH 10-1           | 12.3-15.0 | 5.6-7.8 | 13.5±0.7×6.7±0.6    | 5.6-13.7 | 4.7-8.2 | 8.7±2.5×5.8±1.0     | /         | /       | /                  | 6.6±0.6   | 2.7±0.4   |

<sup>a</sup> Minimum to maximum sizes for length and width of 30 conidia, and mean conidia size. Significance at P = 0.05 level.

<sup>b</sup> Minimum to maximum sizes for length and width of 30 appresoria, and mean appresoria size. Significance at P = 0.05 level.

<sup>c</sup> Minimum to maximum sizes for length and width of 30 ascospores, and mean ascospores size. Significance at P = 0.05 level.

<sup>d</sup> The colony diameter data were measured at the 3th days to calculate the mycelial growth rate (mm/day). Significance at P = 0.05 level.

/ Ascospores were absent.

**Table S4.** Infection rates of seven *Colletotrichum* spp. inoculated on peach fruit and leaves.

| Species             | Isolate          | Origin | Infection rate<br>on fruit | Infection rate<br>on leaves |
|---------------------|------------------|--------|----------------------------|-----------------------------|
| <i>C. nymphaeae</i> |                  |        | 60/60                      | 52/60                       |
|                     | FJFZ 1           | Fruit  | 12/12                      | 10/12                       |
|                     | HBJM 1-1         | Fruit  | 12/12                      | 12/12                       |
|                     | HBWH 3-2         | Leaf   | 12/12                      | 12/12                       |
|                     | HBYC 1           | Fruit  | 12/12                      | 8/12                        |
|                     | SCCD 1           | Fruit  | 12/12                      | 10/12                       |
| <i>C. fioriniae</i> |                  |        | 60/60                      | 56/60                       |
|                     | GZTR 7-1         | Fruit  | 12/12                      | 12/12                       |
|                     | JXJA 1           | Fruit  | 12/12                      | 10/12                       |
|                     | JXJA 6           | Fruit  | 12/12                      | 12/12                       |
|                     | ZJLS 1           | Fruit  | 12/12                      | 12/12                       |
|                     | ZJLS 11-1        | Fruit  | 12/12                      | 10/12                       |
| <i>C. godetiae</i>  |                  |        | 54/60                      | 53/60                       |
|                     | YNHH 1-1         | Leaf   | 12/12                      | 12/12                       |
|                     | YNHH 2-1         | Leaf   | 8/12                       | 8/12                        |
|                     | YNHH 4-1         | Leaf   | 11/12                      | 11/12                       |
|                     | YNHH 7-2         | Leaf   | 12/12                      | 11/12                       |
|                     | YNHH 9-1         | Leaf   | 11/12                      | 11/12                       |
| <i>C. fruticola</i> |                  |        | 60/60                      | 60/60                       |
|                     | GDHY 10-1        | Fruit  | 12/12                      | 12/12                       |
|                     | GDSG 1-1         | Fruit  | 12/12                      | 12/12                       |
|                     | GDSG 5-1         | Fruit  | 12/12                      | 12/12                       |
|                     | GZTR 10-1        | Fruit  | 12/12                      | 12/12                       |
|                     | GZTR 13-1        | Fruit  | 12/12                      | 12/12                       |
| <i>C. siamense</i>  |                  |        | 59/60                      | 59/60                       |
|                     | HBSJZ 1-1        | Fruit  | 12/12                      | 12/12                       |
|                     | HBSJZ 3-1        | Fruit  | 12/12                      | 12/12                       |
|                     | HBSJZ 5-1        | Fruit  | 12/12                      | 11/12                       |
|                     | HBSJZ 7-1        | Fruit  | 11/12                      | 12/12                       |
|                     | SDQD 10-1        | Fruit  | 12/12                      | 12/12                       |
| <i>C. karsti</i>    |                  |        | 7/36                       | 23/36                       |
|                     | YNHH 3-1         | Leaf   | 2/12                       | 7/12                        |
|                     | YNHH 3-2         | Leaf   | 3/12                       | 9/12                        |
|                     | YNHH 5-2         | Leaf   | 2/12                       | 7/12                        |
| <i>C. folicola</i>  |                  |        | 0/24                       | 17/24                       |
|                     | YNHH 2-2         | Leaf   | 0/12                       | 10/12                       |
|                     | YNHH 10-1        | Leaf   | 0/12                       | 7/12                        |
| Control             | H <sub>2</sub> O |        | 0/12                       | 0/12                        |
